# Supplementary material
Source: MDPI journal article supplement (https://www.mdpi.com/2297-8739/4/2/22)
Supplement: s1 [file s1]

## Supplementary Materials

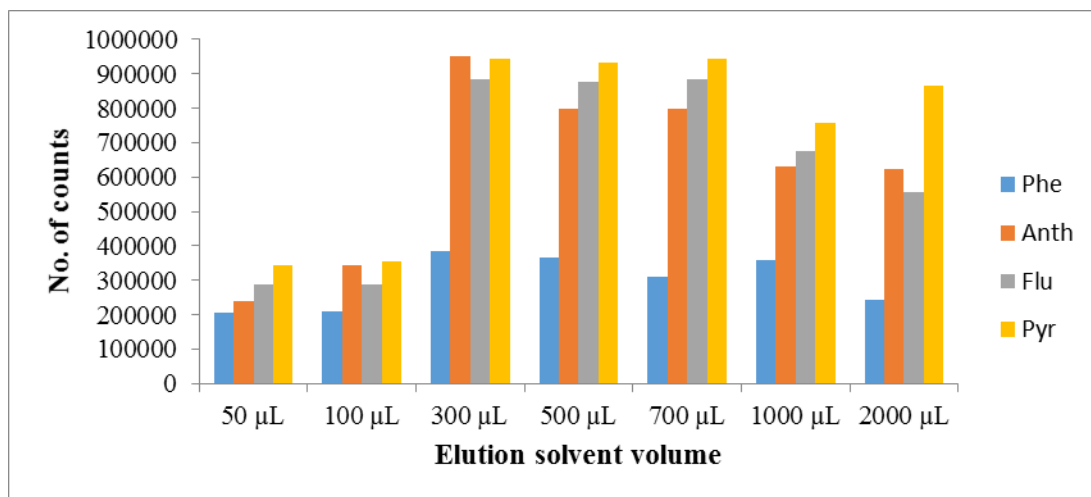

**Figure S1.** Effect of eluent solvent volume. Extraction conditions: sample volume, 15 mL; extraction time, 30 min; eluent solvent, acetonitrile; sonication desorption time, 5 min.

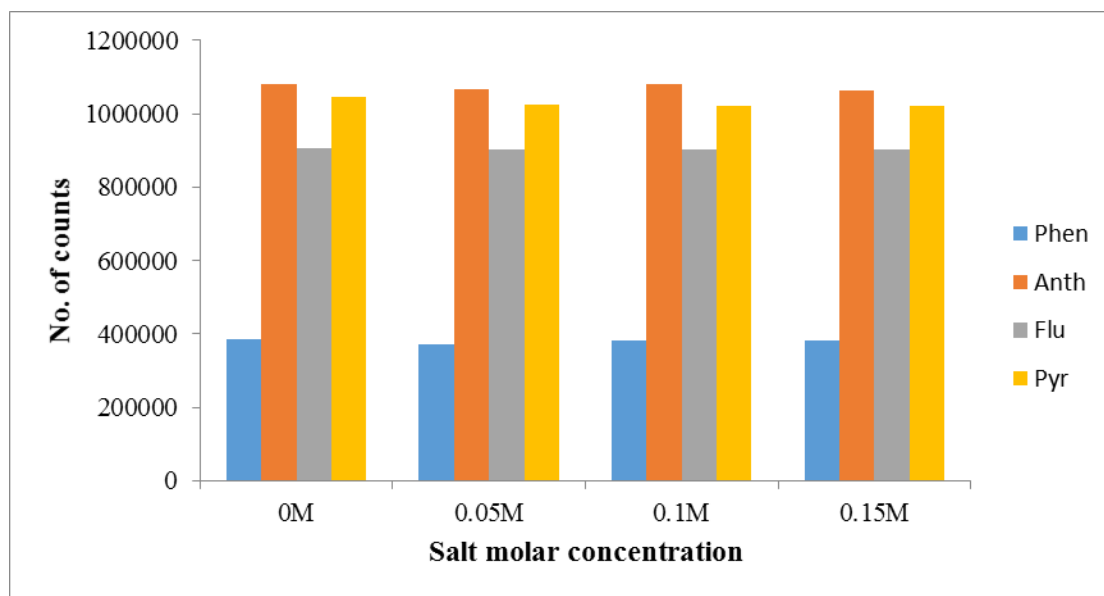

**Figure S2.** Effect of salt concentration. Extraction conditions: sample volume, 15 mL; extraction time, 30 min; eluent solvent, acetonitrile; volume of elution solvent, 300 μL; desorption time, 5 min.

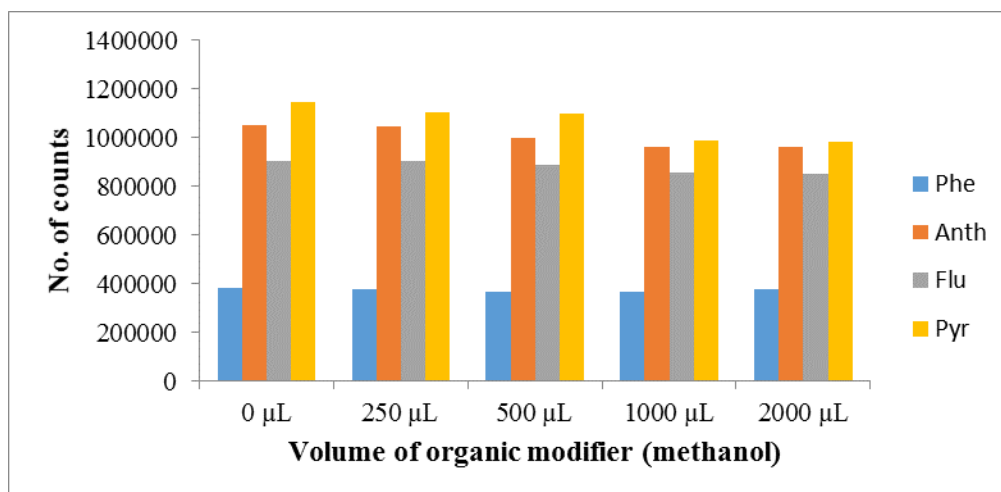

**Figure S3.** Effect of organic modifier volume. Extraction conditions: sample volume, 15 mL; extraction time, 30 min; eluent solvent, acetonitrile; volume of elution solvent, 300 µL; desorption time, 5 min.

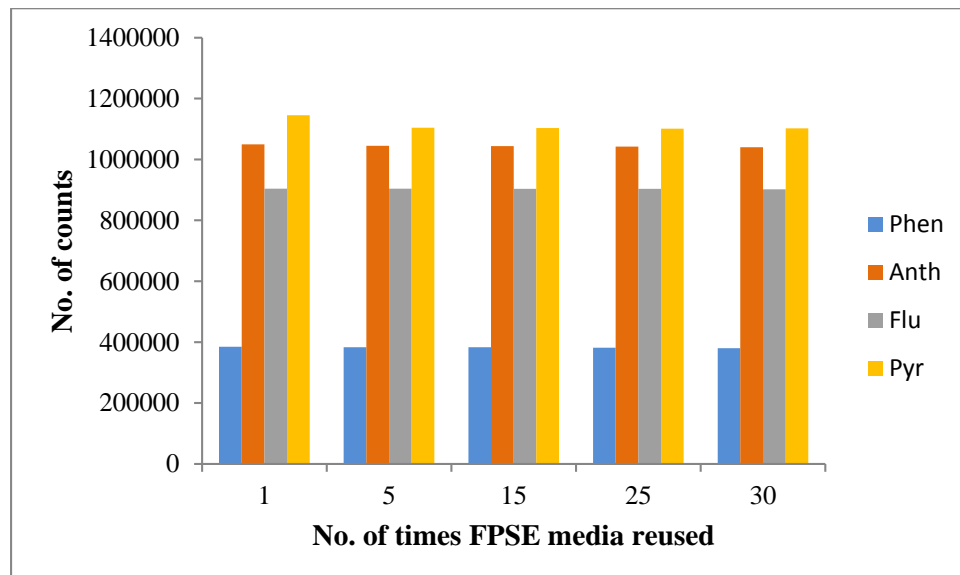

**Figure S4.** Regeneration and reusability of sol-gel C18 coated FPSE media. Extraction conditions: sample volume, 15 mL; extraction time, 30 min; eluent solvent, acetonitrile; volume of elution solvent, 300 µL; desorption time, 5 min.
